# Supplementary material for: Melamine assisted one-pot synthesis of Au nanoflowers and their catalytic activity towards p-nitrophenol
Source: Royal Society of Chemistry journal article supplement (doi:10.1039/c2nj40380c), 2012-01-01
Supplement: c2nj40380c.pdf [file c2nj40380c.pdf]

# Melamine Assisted One-Pot Synthesis of Au Nanoflowers and Their Catalytic Activity towards *p*-Nitrophenol

Ai-Jun Wang,<sup>a,c</sup> Yong-Fang Li,<sup>b</sup> Ming Wen,<sup>c</sup> Gai Yang,<sup>c</sup> Jiu-Ju Feng,<sup>a,c,\*</sup> Jian Yang,<sup>c</sup>  
Hai-Yan Wang<sup>c</sup>

<sup>a</sup>*College of Geography and Environmental Science, College of Chemistry and Life Science,  
Zhejiang Normal University, Jinhua 321004, China*

<sup>b</sup>*College of Chemistry and Chemical Engineering, Henan Institute of Science and Technology,  
Xinxiang, Henan 453003, China*

<sup>c</sup>*Key Laboratory of Green Chemical Media and Reactions, Ministry of Education; School of  
Chemistry and Environmental Science, Henan Normal University, Xinxiang 453007, China*

\*Corresponding author: Jiu-Ju Feng (Email: jjfeng@zjnu.cn).

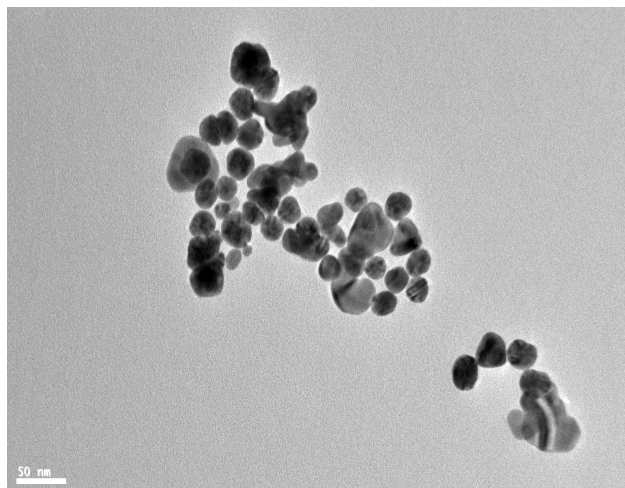

**Fig. S1** TEM image of the gold nanoparticles reduced by freshly prepared AA solution, in the absence of melamine.

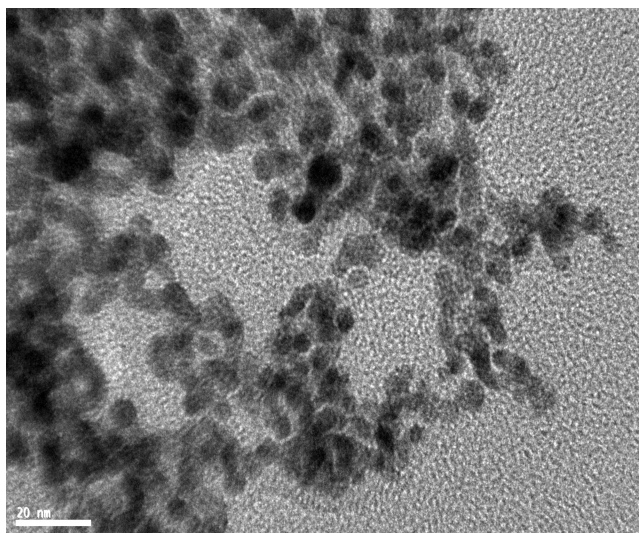

**Fig. S2** TEM image of the gold nanoparticles reduced by ice-cold  $\text{NaBH}_4$  solution, in the presence of 0.5 mM melamine.

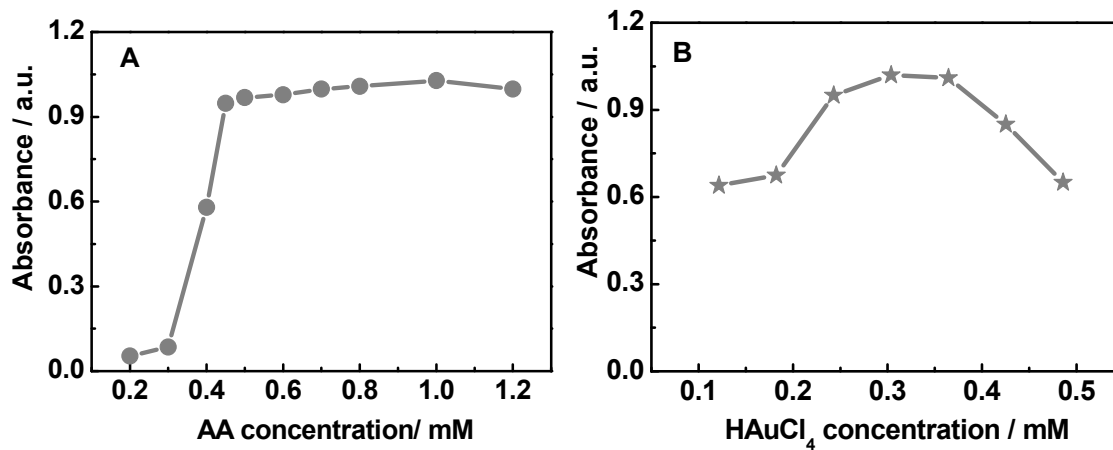

**Fig. S3** The plots of the UV-vis absorbance with different concentrations of AA (A) or HAuCl<sub>4</sub> (B), while other conditions kept constant.

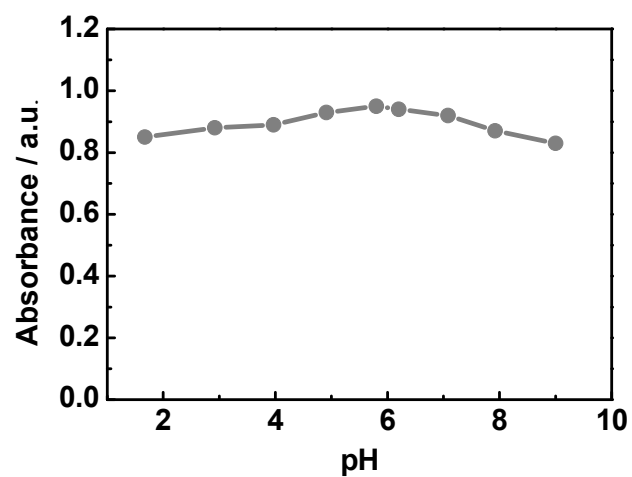

**Fig. S4** Effect of the pH on the absorbance intensity of the gold nanoflowers in the reaction system.

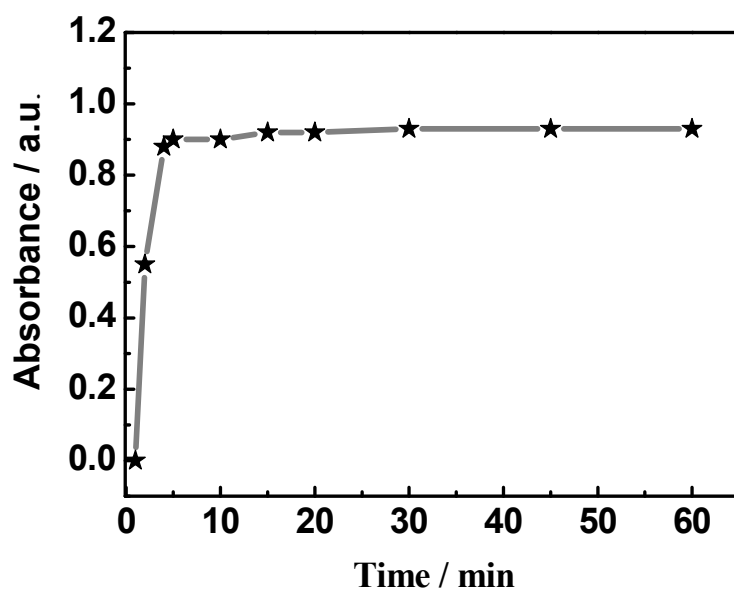

**Fig. S5** Effect of the reaction time on the absorbance intensity of the gold nanoflowers in the reaction system.
